# Supplementary material
Source: Research Square preprint supplement (doi:10.21203/rs.3.rs-8915216/v1)
Supplement: Supplementary file 2 [file 43dd6f95f5fabe0b64a81303.docx]

**Supplement S1.**

**Self-Informant Semi-Structured Interview**

Thank you very much for taking the time to participate in this interview. Your contribution is very valuable to us, and we hope you feel comfortable sharing your thoughts and experiences.

I am a PhD clinical psychologists from (Blind for review) university. This interview aims to explore how you interpret certain statements related to well-being and mood. It is important for us to understand the different perspectives on these topics. I’d like to remind you that this conversation is completely confidential and anonymous.

Please feel free to share your thoughts openly. There are no right or wrong answers here—what matters is your honest opinion.

Before we begin, do you agree to have this conversation recorded?

I want to assure you that your anonymity is fully protected and that nothing you say will ever be linked to your identity. Furthermore, once the conversation has been transcribed, the audio file will be deleted in compliance with data protection regulations.

Do you have any questions?

*Press record.

**Guiding Questions**

1. When you say that you feel optimistic about the future:

o How do you define feeling optimistic about the future?

o Could you provide a specific example of a moment when you felt optimistic about what was to come? (images, thoughts, or sensations that come to mind)

1. Regarding the statement “I have felt useful”:

o What does it mean to you to feel useful?

o Could you share a recent experience or moment in which you felt useful?

1. To better understand what “feeling relaxed” means to you:

o How would you describe the state of relaxation?

o Could you tell me about an activity or moment in which you typically find calm or peace?

1. Concerning the feeling of having “dealt well with problems”:

o How would you define successfully dealing with problems?

o It would be helpful if you could provide some concrete examples of situations in which you managed problems effectively.

1. When you say “I was able to think clearly”:

o What does thinking clearly mean to you?

o In what specific moments do you feel your thoughts are most clear and organized?

1. Talking about “feeling close to others” leads us to think about personal relationships:

o How would you define feeling close to someone?

o Could you share an experience or moment when you felt particularly connected to someone or to a group of people? What did you share?

1. In what situations or moments have you felt that “you were able to make your own decisions”?

o Could you give me a specific example of when you exercised your autonomy?

o What was that experience like for you, and what did making your own decisions mean to you?

1. Who have you chosen as your informant, and why?

Thank you very much for sharing your experiences and perspectives with us. Before we conclude, is there anything we haven’t covered that you consider important, or any final comment you would like to add?

**External Informant Semi-Structured Interview**

Thank you very much for taking the time to participate in this interview. Your contribution is very valuable to us, and we hope you feel comfortable sharing your thoughts and experiences.

This interview aims to explore how you interpret certain statements related to the user’s well-being and mood. It is important for us to understand different perspectives on these issues from the caregiver’s point of view. I’d like to remind you that this conversation is completely confidential and anonymous.

Please feel free to share your thoughts openly. There are no right or wrong answers—what matters is your sincere perspective.

Before we begin, do you agree to have this conversation recorded?

I want to assure you that your anonymity is fully protected and that nothing you say will ever be linked to your identity. Furthermore, once the conversation has been transcribed, the audio file will be deleted in compliance with data protection regulations.

Do you have any questions?

*Press record.

**Guiding Questions**

1. When you observe that the user feels optimistic about the future:

o Could you explain what you understand by optimism in this context?

o Could you describe specific situations where you noticed this optimism, and what aspects led you to that conclusion?

1. Regarding the statement “The user has felt useful”:

o What does it mean to you that the user felt useful? How do you define this sense of usefulness in the user?

o Could you share a specific situation in which the user demonstrated feeling useful?

1. To better understand what “feeling relaxed” means for the user:

o How would you define relaxation in this context?

o Could you describe a particular activity or moment in which you usually notice the user feeling calm or at ease?

1. Concerning the idea that the user has “dealt well with problems”:

o What does it mean to you that the user has dealt well with problems?

o It would be very helpful if you could provide specific examples of times when you observed this ability. What behaviors or attitudes demonstrated effective problem management?

1. When you mention that the user has “been able to think clearly”:

o What characterizes clear thinking in the user, from your perspective?

o Are there specific moments you can share where you noticed a significant improvement in the user’s clarity of thought? What changes in their communication or actions made this noticeable?

1. Talking about “feeling close to others”:

o How would you describe this sense of closeness or connection in the user?

o We would appreciate it if you could share an experience or moment in which you observed the user feeling particularly connected to someone or to a group. How was this connection expressed? What did it consist of?

1. In what situations have you noticed that the user has “been able to make their own decisions”?

o How would you define autonomy in this context?

o Could you give us an example where the user made an important decision on their own?

We deeply appreciate you sharing your experiences and observations.

Before we conclude, is there anything we haven’t covered that you believe is important to add, or any suggestion you would like to share?
