# Supplementary material
Source: Research Square preprint supplement (doi:10.21203/rs.3.rs-8915216/v1)
Supplement: Supplementary file 3 [file 884d1b4f4f47bc605e723f8e.docx]

**Supplement S2. Qualitative Codebook**

| *Item* | Code and definition | Example in self- informant | Example in external informant |
| --- | --- | --- | --- |
| Item 1: Optimism. | *Cognitive*: Refers to optimistic thinking and future expectations grounded in both objective information and personal beliefs. | *"Optimism about the future is thinking positively about everything and about how I will move forward. (…) The future is always uncertain, but let’s try not to think negatively. Instead, let’s think positively."* | "*Seeing the positive side of life, even in the worst-case scenario."* |
| *Motivational Optimism*: Refers to the drive or energy to act with a positive outlook, encouraging individuals to move forward and pursue their goals. This form of optimism serves as a motivational force directed toward positive outcomes. | *“It's about having enthusiasm and a drive to do things”*  *“You feel positive, as if you’re eager to do more. You’re motivated... you have a positive outlook toward a future full of goals.”)* | *"I think when I perceive that they feel optimistic, it’s because they express it in some way. Maybe in different contexts, but they show they are setting goals, making plans. Many of them say things like, ‘If you fall, you have to get back up, again and again,’ or ‘You have to keep moving forward.’ Phrases like that make it clear that they feel optimistic when they say them."* |
| *Hope-Based Optimism*: An emotional sense of well-being rooted in the support of personal relationships and a sense of belonging, nurturing positive expectations about the future. This form of optimism is affective in nature and closely tied to the emotional and social support context. | *It is being in tune with your finances and social life. Having a pleasant conversation with someone, or things like that. Enjoying a certain calm at home. Being optimistic about the future means having some security.”* | *"Someone who sees the future with happiness."*  *"When a user feels optimistic, it’s because they are on a recovery path, aligned with their life goals, and feel capable of achieving them with our support."* |
| Item 2. Feeling Useful | *Self-Acceptance*: Involves feeling at ease with oneself, even when acknowledging personal limitations. The individual values their strengths and achievements. | *“Feeling valid about what you do, about what you are capable of”* | *“Because he has free time to help his mother and feels good about it”* |
| *Autonomy and Freedom*: Refers to the capacity to act independently, making decisions based on one’s own values and criteria, without relying on others’ approval. Associated with self-determination and an internal locus of control. | *“To manage on one’s own.”*  *“When I do something, something that I decide for myself, I feel better.”* | *“When he is able to make his own decisions”* |
| *Environmental Mastery*: The ability to manage and adapt to one’s environment, selecting or shaping contexts in which one feels competent and in control. | *“Doing things at home. I am an integral part—a key component.”* | *“When he feels that he can help others, when he is able to work, etc.”* |
| *Personal Growth*: The desire for continuous development and self-improvement, involving resilience and engagement in personal challenges. Reflects a commitment to becoming the best version of oneself. | *“Feeling useful, being able to contribute in this society we live in.”*  *“Succeeding at something.”* | *“When he manages to achieve what he sets out to do and feels satisfied”* |
| Item 3. Feeling relaxed | *Affective Balance*: Refers to emotional equilibrium, with a general sense of peace and stability, characterized by a balance between positive and negative affect. | *“The absence of intrusive thoughts or threatening situations”*  *“I can have a few thoughts, but without mental noise or thoughts that might make me a little nervous.”* | *“When he is calm, without anxiety or euphoria”.* |
| *Absence of Stress*: Reflects low vulnerability to stress and a psychological state where external events have reduced emotional impact. | *“When I am calm – that is, when I have no worries”* | *“When he feels calm, without the nervousness of having to find a job at that moment, for example”* |
| *Security*: A subjective feeling of trust and safety in one’s environment and in interpersonal relationships. This includes emotional and cognitive responses and is often linked to a sense of belonging. | *“Well, relaxed. I mean, to have a certain calm around you, knowing that you can… that you can have a point of support there.”* | *“He feels calm and secure at the center, it shows that he is being himself and flows well with others* |
| *Physical Calm*: A bodily state of relaxation, free from tension, which allows for sleep, rest, or stillness. | *“When I am in a quiet place, I try to take deep breaths and concentrate on my breathing.”*  *“When my muscles are at rest.”* | *“When we are in a relaxation session, or when he lies down and listens to music”* |
| Item 4. Coping | *Active Behavioral Coping*: Taking direct and concrete actions to resolve a stressful situation independently, increasing personal involvement to reduce the stressor. | *“It’s just my nature – I have to solve problems, to solve them as quickly as possible.”*  *“I have a mother with dementia, and I’m her only daughter. So, from time to time, problems arise with her that I must resolve ”* | *“That is, when he has a problem, he usually faces it and solves it without any difficulty”* |
| *Cognitive Coping*: Involves mental strategies such as planning, setting goals, reinterpreting situations, or identifying positive aspects to foster growth or adaptation. | *“You take it calmly and say, ‘Well, I’ll see what I can do about this problem without getting… well, nervous or overthinking it; instead, you face it in a relatively calm manner, weighing the advantages and disadvantages”.* | *“When he considers the problem in a more positive light and plans how to solve it”* |
| *Help-Seeking* (Instrumental and Emotional Support): Seeking advice, information, or emotional support from competent others to reduce stress, feeling alone, and foster connection. | *“One option is to face them on my own, or to seek help from people around me who can assist“* | *“That he asks for help, that he expresses himself, um… something like that… that, above all, he asks for help at the appropriate momento”* |
| *Acceptance*: Acknowledging the reality of a situation and ceasing to fight against unchangeable aspects, thus enabling psychological adjustment | *“To accept life as it is, to endure it”* | *“When he accepts himself as he is”* |
| Item 5. Thinking Clearly | *Mental Calm*: A relaxed mental state that facilitates clear, organized, and stable thinking, free from interference by symptoms such as hallucinations or intrusive thoughts. | *“To have things clear – to have clarity without external symptoms interfering”* | *“When he is more stable -in the sense that he is generally doing better - so that he can speak in a more neutral, nonjudgmental manner about any topic in which he is neither the cause, nor the burden, nor the consequence”*  *“Not being as affected by the negative emotions arising from some situations and being able to view things with a bit more perspective”* |
| *Purpose in Life*: Thinking oriented toward future goals and meaningful action. Involves decision-making, goal setting, and linking actions to personal values (e.g., family well-being, coherence in daily life). | *“To think clearly… about the future, about everyday life, gradually—by doing this and that, and managing as well as I can”* | *“It’s as if he is clear about his current position, that he knows he must make a decision regarding his situation, and that he is satisfied with the decision he makes”* |
| Item 6. Feeling Close to Others | *Positive Relationships*: Having warm, intimate, and trusting relationships; expressing affection and connecting meaningfully with others. This is considered a core element of psychological well-being. | *“A person I can talk to, greet, and meet with someday; someone who helps me with my way of being, who helps me understand myself, and who cares for me.”*  *“So, we find that affection in that person, in others”* | *“When he has more contact -for example, via telephone, asking how others are doing and when they will meet -he shows a great deal of affection toward them, and they reciprocate”* |
| *Sharing Activities*: Feeling close through shared experiences and meaningful interactions, which create common memories and reinforce relational bonds. | *“Because often we are together, whether at my house or at theirs. If he has ever slept at my place, and sometimes at his own…”*  *“I have known him since we were children”* | *“When he tells me that he has spoken with someone at the center”* |
| Item 7. Ability to Make Decisions | *Self-Efficacy*: A behavioral component referring to the belief “I know how to handle it and I can solve it.” It reflects confidence in one’s own ability to act effectively | *“When it comes to facing problems—not necessarily big problems, but situations at home, like if something breaks or if I need to be careful with an appliance, say the microwave… I don’t need anyone to be self‑sufficient in that regard”* | *“In that context, I believe he does not depend on me to make decisions, nor does he depend on me to carry them out in his daily life. For example, when he needed to set up a fan, he did not rely on us to do it; instead, he managed to obtain one through other supports, which also helped him realize that he can accomplish it in a different way than solely through me”* |
| *Self-Determination*: A cognitive component related to the capacity to make one’s own decisions, based on internal reasoning and personal values. | *"Sometimes you have to say, 'Okay, I have to make a decision, and I don’t care what others say or think, because I’m an adult woman and I must decide.'* | *“She makes her own decisions every day; she decides for herself, she doesn’t necessarily need to ask for help or anything like that.”* |
| *Freedom or Empowerment*: A subjective sense of being free and capable of making personal decisions without external constraint. Participants expressed the feeling of “having a voice.” | *“To be autonomous and to have control of my life… to be the queen of my life”* | *“He feels liberated, not because he doesn’t love her (in fact, he loves her dearly), but because he feels, 'Now I am me. I do what I believe is right. I say what I want to say, and nothing stops me”* |
